# Supplementary material
Source: PubMed Central journal article supplement (PMC1157018)

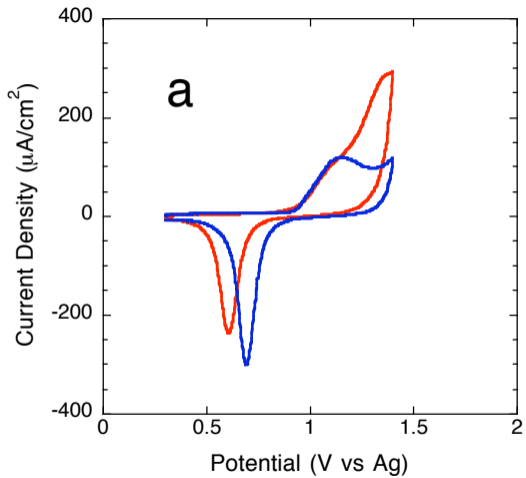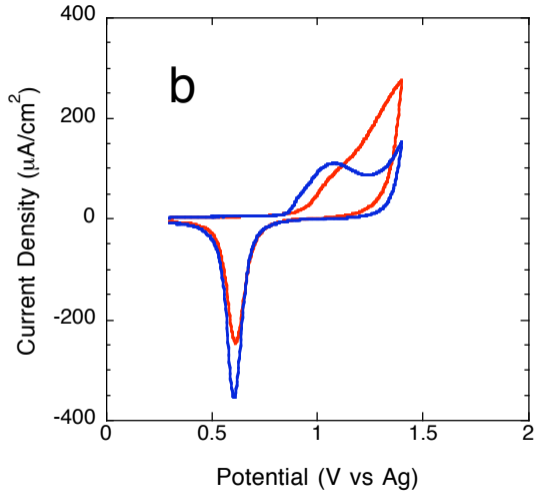

Supplement: pnas_0500002102_2.pdf [file pnas_0500002102_2.pdf]
